# Supplementary material for: Semi-Automated Segmentation of Bone Metastases from Whole-Body MRI: Reproducibility of Apparent Diffusion Coefficient Measurements
Source: PubMed Central journal article supplement (PMC7998160; doi:10.3390/diagnostics11030499), 2021-03-11
Supplement: diagnostics-11-00499-s001.pdf [file diagnostics-11-00499-s001.pdf]

Article

# Semi-automated Segmentation of Bone Metastases from Whole-Body MRI: Reproducibility of Apparent Diffusion Coefficient Measurements

## Supplementary Material

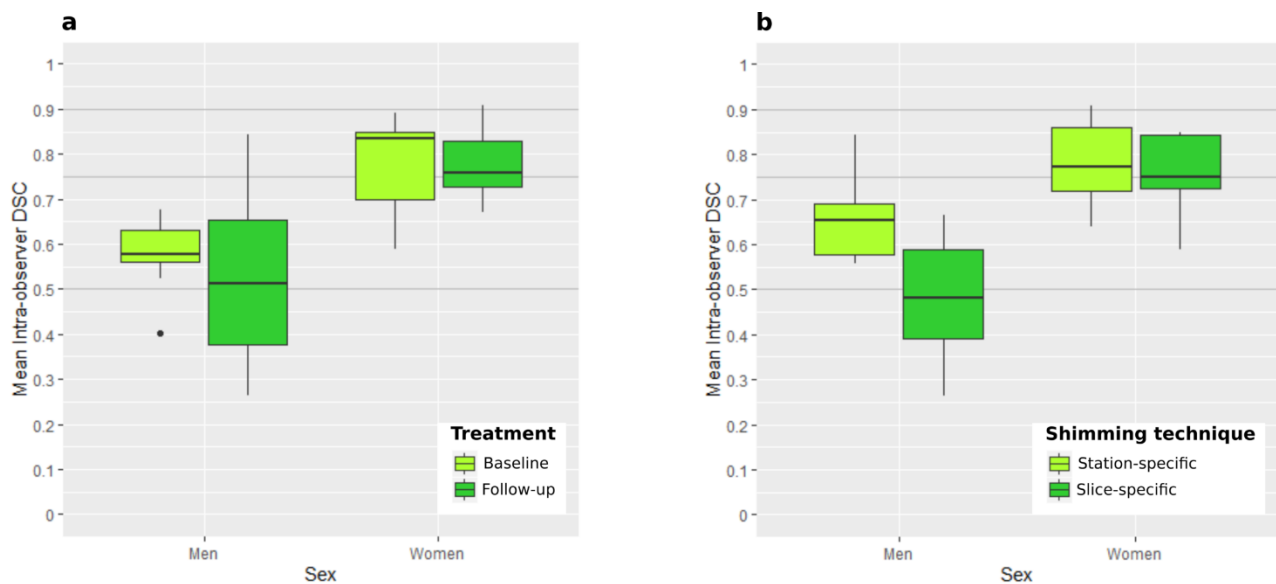

**Figure S1.** Effect of sex, treatment status and shimming technique on Dice Similarity Coefficients (DSC). The box-plots show the distribution of mean intra-observer Dice Similarity Coefficients (DSC), dividing the population by patient sex, treatment status (baseline or follow-up) and shimming technique used (station-specific or slice-specific). A significant difference in DSC was apparent between men and women ( $p=0.0001$ ). (a) The difference between DSC measured in baseline and follow-up whole-body MRI examinations wasn't significant for men ( $p=0.63$ ) or women ( $p=0.97$ ). (b) While shimming technique had minimal effect on DSC values in women ( $p=0.54$ ), a significant difference was observed in men ( $p=0.02$ ).

**Table S1.** Segmentation settings and duration

| <b>Observer, reading session</b> | <b>Comp_b (s/mm<sup>2</sup>)</b> | <b>Threshold (SI)</b> | <b>Duration (min)</b> |
|----------------------------------|----------------------------------|-----------------------|-----------------------|
| <b>Obs 1, 1<sup>st</sup></b>     | 1057.5 ± 67.5                    | 42.0 ± 40.1           | 13.9 ± 5.7            |
| <b>Obs 1, 2<sup>nd</sup></b>     | 1057.5 ± 59.4                    | 36.2 ± 23.7           | 13.3 ± 6.1            |
| <b>Obs 2, 1<sup>st</sup></b>     | 995.0 ± 38.9                     | 45.1 ± 27.3           | 22.1 ± 7.8            |
| <b>Obs 2, 2<sup>nd</sup></b>     | 993.8 ± 23.2                     | 47.3 ± 41.6           | 17.8 ± 8.1            |
| <b>Obs 3, 1<sup>st</sup></b>     | 986.3 ± 83.2                     | 44.7 ± 35.1           | 12.2 ± 5.8            |
| <b>Obs 3, 2<sup>nd</sup></b>     | 988.8 ± 50.0                     | 45.0 ± 39.6           | 9.4 ± 5.0             |
| <b>Obs 4, 1<sup>st</sup></b>     | 1011.3 ± 53.7                    | 32.5 ± 20.5           | 27.9 ± 6.5            |
| <b>Obs 4, 2<sup>nd</sup></b>     | 1007.5 ± 26.7                    | 33.0 ± 20.0           | 25.3 ± 7.6            |

**Comp\_b = simulated diffusion-weighted image stack, SI = Signal Intensity.**

**Table S2.** Distribution descriptors of parameters measured in the second reading

|                     | Unit                     | Patients with BCa |                   | Patients with PCa |                    |
|---------------------|--------------------------|-------------------|-------------------|-------------------|--------------------|
|                     |                          | Baseline          | Follow-up         | Baseline          | Follow-up          |
| <b>Mean_ADC</b>     | $\mu\text{m}^2/\text{s}$ | 936.6 $\pm$ 101.9 | 945.4 $\pm$ 91.3  | 963.5 $\pm$ 91.5  | 1033.5 $\pm$ 84.1  |
| <b>Median_ADC</b>   | $\mu\text{m}^2/\text{s}$ | 899.0 $\pm$ 143.2 | 913.0 $\pm$ 129.6 | 945.0 $\pm$ 132   | 1039.5 $\pm$ 119.0 |
| <b>5%_ADC</b>       | $\mu\text{m}^2/\text{s}$ | 686.0 $\pm$ 59.8  | 669.0 $\pm$ 28.3  | 675.5 $\pm$ 27.2  | 708.0 $\pm$ 57.4   |
| <b>95%_ADC</b>      | $\mu\text{m}^2/\text{s}$ | 1302.0 $\pm$ 42.4 | 1319.0 $\pm$ 41.5 | 1324.5 $\pm$ 46.4 | 1343.9 $\pm$ 23.6  |
| <b>Std_ADC</b>      | $\mu\text{m}^2/\text{s}$ | 193.2 $\pm$ 24.7  | 206.5 $\pm$ 15.6  | 207.2 $\pm$ 21.1  | 199.6 $\pm$ 22.2   |
| <b>Skewness_ADC</b> | -                        | 0.5 $\pm$ 0.7     | 0.5 $\pm$ 0.6     | 0.4 $\pm$ 0.6     | -0.1 $\pm$ 0.6     |
| <b>Kurtosis_ADC</b> | -                        | -0.2 $\pm$ 0.8    | -0.6 $\pm$ 0.8    | -0.6 $\pm$ 0.9    | -0.7 $\pm$ 0.6     |
| <b>Entropy_ADC</b>  | -                        | 10.0 $\pm$ 0.7    | 9.7 $\pm$ 0.6     | 9.3 $\pm$ 0.7     | 9.0 $\pm$ 0.7      |
| <b>Volume</b>       | $\text{cm}^3$            | 429.2 $\pm$ 297.5 | 281.2 $\pm$ 165.2 | 206.9 $\pm$ 159.1 | 143.2 $\pm$ 118.6  |

BCa = Breast cancer, PCa = Prostate cancer.

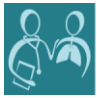

**Table S3.** Summary tables of intra-observer (on-diagonal) and inter-observer (off-diagonal) mean Dice Similarity Coefficients (DSC) by reading

| <i>Entire Cohort</i> |             |             |             |             |
|----------------------|-------------|-------------|-------------|-------------|
| Observer             | 1           | 2           | 3           | 4           |
| 1                    | 0.69 ± 0.21 | 0.48 ± 0.27 | 0.60 ± 0.26 | 0.57 ± 0.21 |
| 2                    | 0.52 ± 0.27 | 0.59 ± 0.23 | 0.52 ± 0.21 | 0.43 ± 0.25 |
| 3                    | 0.57 ± 0.23 | 0.57 ± 0.21 | 0.66 ± 0.22 | 0.52 ± 0.20 |
| 4                    | 0.64 ± 0.22 | 0.50 ± 0.25 | 0.51 ± 0.24 | 0.71 ± 0.19 |

  

| <i>Women</i> |             |             |             |             |
|--------------|-------------|-------------|-------------|-------------|
| Observer     | 1           | 2           | 3           | 4           |
| 1            | 0.80 ± 0.13 | 0.70 ± 0.14 | 0.78 ± 0.16 | 0.67 ± 0.17 |
| 2            | 0.72 ± 0.17 | 0.73 ± 0.16 | 0.64 ± 0.16 | 0.58 ± 0.17 |
| 3            | 0.73 ± 0.13 | 0.73 ± 0.14 | 0.81 ± 0.12 | 0.63 ± 0.15 |
| 4            | 0.75 ± 0.17 | 0.64 ± 0.19 | 0.68 ± 0.18 | 0.78 ± 0.17 |

  

| <i>Men</i> |             |             |             |             |
|------------|-------------|-------------|-------------|-------------|
| Observer   | 1           | 2           | 3           | 4           |
| 1          | 0.59 ± 0.22 | 0.27 ± 0.18 | 0.42 ± 0.21 | 0.48 ± 0.21 |
| 2          | 0.32 ± 0.20 | 0.46 ± 0.22 | 0.40 ± 0.17 | 0.29 ± 0.23 |
| 3          | 0.41 ± 0.20 | 0.42 ± 0.15 | 0.52 ± 0.19 | 0.40 ± 0.19 |
| 4          | 0.53 ± 0.22 | 0.36 ± 0.23 | 0.34 ± 0.16 | 0.65 ± 0.20 |

**Legend:**

|                                              |
|----------------------------------------------|
| Intra-observer DSC                           |
| Inter-observer DSC (1 <sup>st</sup> reading) |
| Inter-observer DSC (2 <sup>nd</sup> reading) |

**Table S4.** Summary of intra- and inter- observer Bland-Altman analysis results (bias and limits of agreement) for mean apparent diffusion coefficient (ADC) as percentages of the mean of the measures

***Intra-observer analysis***

| Observers      | 1                           | 2                             | 3                            | 4                          |
|----------------|-----------------------------|-------------------------------|------------------------------|----------------------------|
| <b>Overall</b> | 0.5 (-6.5 - 7.5);<br>954.1  | 0.8 (-11.6 - 13.2);<br>992.9  | 0.2 (-7.3 - 7.8);<br>978.9   | 0.1 (-4.6 - 4.9);<br>961.4 |
| <b>Women</b>   | -0.2 (-5.3 - 4.9);<br>929.8 | 1.2 (-7.4 - 9.7);<br>951.3    | 0.4 (-3.2 - 4.0);<br>952.2   | 0.2 (-4.9 - 5.3);<br>938.2 |
| <b>Men</b>     | 1.1 (-7.2 - 9.4);<br>978.3  | 0.5 (-14.6 - 15.7);<br>1034.5 | 0.1 (-9.8 - 10.0);<br>1005.6 | 0.1 (-4.4 - 4.6);<br>984.6 |

***Inter-observer analysis (1<sup>st</sup> reading)***

| Observers:     | 1-2                            | 1-3                          | 1-4                         | 2-3                           | 2-4                           | 3-4                         |
|----------------|--------------------------------|------------------------------|-----------------------------|-------------------------------|-------------------------------|-----------------------------|
| <b>Overall</b> | -4.2 (-17.4 - 9.0);<br>976.7   | -2.5 (-9.9 - 5.0);<br>968.2  | -0.6 (-7.8 - 6.7);<br>959.2 | 1.7 (-10.8 - 14.2);<br>988.5  | 3.6 (-9.9 - 17.0);<br>979.5   | 1.9 (-6.0 - 9.7);<br>971    |
| <b>Women</b>   | -2.9 (-12.9 - 7);<br>942.9     | -2.7 (-7.8 - 2.4);<br>941.5  | -1.1 (-7.4 - 5.2);<br>934   | 0.3 (-8.5 - 9.0);<br>955.4    | 1.9 (-8.6 - 12.4);<br>947.9   | 1.6 (-3.9 - 7.1);<br>946.5  |
| <b>Men</b>     | -5.3 (-20.7 - 10.0);<br>1010.5 | -2.2 (-11.4 - 6.9);<br>994.8 | -0.1 (-8.2 - 7.9);<br>984.4 | 3.1 (-11.7 - 17.8);<br>1021.7 | 5.2 (-10.0 - 20.3);<br>1011.2 | 2.1 (-7.5 - 11.7);<br>995.6 |

***Inter-observer analysis (2<sup>nd</sup> reading)***

| Observers:     | 1-2                           | 1-3                          | 1-4                         | 2-3                          | 2-4                          | 3-4                          |
|----------------|-------------------------------|------------------------------|-----------------------------|------------------------------|------------------------------|------------------------------|
| <b>Overall</b> | -3.8 (-13.4 - 5.8);<br>970.3  | -2.7 (-12.2 - 6.8);<br>964.8 | -0.9 (-7.0 - 5.1);<br>656.2 | 1.1 (-6.6 - 8.8);<br>983.2   | 2.9 (-5.6 - 11.4);<br>974.7  | 1.8 (-8.0 - 11.6);<br>969.2  |
| <b>Women</b>   | -1.6 (-8.4 - 5.2);<br>938.2   | -2.1 (-8.4 - 4.2);<br>940.5  | -0.7 (-6.7 - 5.3);<br>934   | -0.5 (-3.7 - 2.8);<br>948    | 0.9 (-4.6 - 6.4);<br>941.6   | 1.4 (-4.1 - 6.8);<br>943.8   |
| <b>Men</b>     | -5.9 (-15.7 - 4.0);<br>1002.3 | -3.3 (-15.0 - 8.4);<br>989.1 | -1.1 (-7.3 - 5.1);<br>978.5 | 2.6 (-6.7 - 11.9);<br>1018.5 | 4.7 (-4.3 - 13.8);<br>1007.9 | 2.1 (-10.5 - 14.7);<br>994.6 |

Note. - Values are: Bias (Lower – Upper 95% limits of agreement) mean of the underlying measurements.

Bias and limits of agreement are expressed as percentages of the mean underlying measurements.

**Table S5.** Intra- and inter-observer Intra-class Correlation Coefficients (ICC)

|                     |         | <i>Intra-observer</i> |                      |                     |                    | <i>Inter-observer</i> |                               |                               |
|---------------------|---------|-----------------------|----------------------|---------------------|--------------------|-----------------------|-------------------------------|-------------------------------|
|                     |         | <b>1</b>              | <b>2</b>             | <b>3</b>            | <b>4</b>           | <b>Mean (intra-)</b>  | <b>1<sup>st</sup> reading</b> | <b>2<sup>nd</sup> reading</b> |
| <b>Mean ADC</b>     | Overall | 0.94 (0.89 - 0.97)    | 0.81 (0.67 - 0.90)   | 0.92 (0.85 - 0.95)  | 0.97 (0.95 - 0.99) | 0.91 (0.84 - 0.95)    | 0.83 (0.73 - 0.90)            | 0.88 (0.80 - 0.94)            |
|                     | Women   | 0.97 (0.93 - 0.99)    | 0.91 (0.79 - 0.96)   | 0.98 (0.96 - 0.99)  | 0.97 (0.92 - 0.99) | 0.96 (0.90 - 0.98)    | 0.91 (0.82 - 0.96)            | 0.96 (0.91 - 0.98)            |
|                     | Men     | 0.9 (0.77 - 0.96)     | 0.61 (0.23 - 0.83)   | 0.81 (0.58 - 0.92)  | 0.98 (0.95 - 0.99) | 0.82 (0.63 - 0.92)    | 0.72 (0.53 - 0.86)            | 0.79 (0.60 - 0.91)            |
| <b>Median ADC</b>   | Overall | 0.93 (0.87 - 0.96)    | 0.77 (0.60 - 0.87)   | 0.91 (0.84 - 0.95)  | 0.97 (0.95 - 0.99) | 0.90 (0.82 - 0.94)    | 0.82 (0.73 - 0.89)            | 0.89 (0.82 - 0.93)            |
|                     | Women   | 0.97 (0.94 - 0.99)    | 0.86 (0.68 - 0.94)   | 0.98 (0.96 - 0.99)  | 0.97 (0.92 - 0.99) | 0.95 (0.87 - 0.98)    | 0.89 (0.80 - 0.95)            | 0.96 (0.93 - 0.98)            |
|                     | Men     | 0.88 (0.72 - 0.95)    | 0.58 (0.19 - 0.81)   | 0.80 (0.55 - 0.91)  | 0.98 (0.94 - 0.99) | 0.81 (0.60 - 0.92)    | 0.72 (0.54 - 0.86)            | 0.79 (0.62 - 0.90)            |
| <b>5% ADC</b>       | Overall | 0.88 (0.78 - 0.93)    | 0.94 (0.90 - 0.97)   | 0.81 (0.67 - 0.89)  | 0.97 (0.94 - 0.98) | 0.90 (0.82 - 0.94)    | 0.88 (0.81 - 0.93)            | 0.87 (0.80 - 0.92)            |
|                     | Women   | 1.00 (0.99 - 1.00)    | 0.98 (0.94 - 0.99)   | 0.99 (0.97 - 1.00)  | 0.98 (0.95 - 0.99) | 0.98 (0.96 - 0.99)    | 0.95 (0.90 - 0.98)            | 0.96 (0.93 - 0.98)            |
|                     | Men     | 0.73 (0.43 - 0.88)    | 0.91 (0.78 - 0.96)   | 0.65 (0.32 - 0.84)  | 0.96 (0.90 - 0.98) | 0.81 (0.61 - 0.92)    | 0.81 (0.66 - 0.91)            | 0.78 (0.62 - 0.89)            |
| <b>95% ADC</b>      | Overall | 0.92 (0.85 - 0.96)    | 0.81 (0.67 - 0.90)   | 0.87 (0.76 - 0.93)  | 0.92 (0.86 - 0.96) | 0.88 (0.78 - 0.93)    | 0.66 (0.50 - 0.78)            | 0.71 (0.56 - 0.82)            |
|                     | Women   | 0.95 (0.88 - 0.98)    | 0.89 (0.75 - 0.95)   | 0.90 (0.76 - 0.96)  | 0.90 (0.77 - 0.96) | 0.91 (0.79 - 0.96)    | 0.76 (0.59 - 0.89)            | 0.81 (0.67 - 0.91)            |
|                     | Men     | 0.86 (0.68 - 0.94)    | 0.05 (-0.42 - 0.48)  | 0.74 (0.45 - 0.89)  | 0.94 (0.85 - 0.98) | 0.65 (0.39 - 0.82)    | 0.42 (0.20 - 0.66)            | 0.54 (0.28 - 0.76)            |
| <b>Std ADC</b>      | Overall | 0.87 (0.77 - 0.93)    | 0.85 (0.74 - 0.92)   | 0.83 (0.70 - 0.91)  | 0.93 (0.88 - 0.96) | 0.87 (0.77 - 0.93)    | 0.66 (0.52 - 0.78)            | 0.68 (0.55 - 0.8)             |
|                     | Women   | 0.94 (0.85 - 0.97)    | 0.94 (0.85 - 0.98)   | 0.96 (0.90 - 0.98)  | 0.90 (0.78 - 0.96) | 0.94 (0.85 - 0.97)    | 0.84 (0.71 - 0.92)            | 0.84 (0.72 - 0.93)            |
|                     | Men     | 0.81 (0.58 - 0.92)    | 0.75 (0.46 - 0.89)   | 0.71 (0.39 - 0.87)  | 0.96 (0.90 - 0.98) | 0.81 (0.59 - 0.92)    | 0.47 (0.25 - 0.70)            | 0.53 (0.32 - 0.74)            |
| <b>Skewness ADC</b> | Overall | 0.95 (0.90 - 0.97)    | 0.76 (0.59 - 0.87)   | 0.90 (0.82 - 0.95)  | 0.97 (0.95 - 0.99) | 0.9 (0.82 - 0.94)     | 0.79 (0.68 - 0.87)            | 0.88 (0.80 - 0.93)            |
|                     | Women   | 0.97 (0.92 - 0.99)    | 0.89 (0.76 - 0.96)   | 0.98 (0.95 - 0.99)  | 0.96 (0.89 - 0.98) | 0.95 (0.88 - 0.98)    | 0.88 (0.77 - 0.94)            | 0.95 (0.90 - 0.98)            |
|                     | Men     | 0.92 (0.81 - 0.97)    | 0.51 (0.10 - 0.77)   | 0.78 (0.53 - 0.91)  | 0.98 (0.96 - 0.99) | 0.80 (0.6 - 0.91)     | 0.68 (0.48 - 0.84)            | 0.79 (0.62 - 0.90)            |
| <b>Kurtosis ADC</b> | Overall | 0.90 (0.83 - 0.95)    | 0.75 (0.58 - 0.86)   | 0.76 (0.59 - 0.87)  | 0.92 (0.86 - 0.96) | 0.83 (0.71 - 0.91)    | 0.54 (0.38 - 0.69)            | 0.69 (0.55 - 0.81)            |
|                     | Women   | 0.91 (0.79 - 0.96)    | 0.88 (0.73 - 0.95)   | 0.91 (0.78 - 0.96)  | 0.88 (0.72 - 0.95) | 0.89 (0.76 - 0.96)    | 0.67 (0.47 - 0.83)            | 0.83 (0.69 - 0.92)            |
|                     | Men     | 0.89 (0.74 - 0.96)    | 0.53 (0.12 - 0.78)   | 0.61 (0.26 - 0.82)  | 0.97 (0.92 - 0.99) | 0.75 (0.51 - 0.89)    | 0.39 (0.17 - 0.64)            | 0.54 (0.32 - 0.75)            |
| <b>Entropy ADC</b>  | Overall | 0.71 (0.51 - 0.84)    | 0.37 (0.09 - 0.61)   | 0.67 (0.45 - 0.81)  | 0.67 (0.46 - 0.81) | 0.60 (0.38 - 0.76)    | 0.36 (0.19 - 0.55)            | 0.57 (0.40 - 0.72)            |
|                     | Women   | 0.81 (0.58 - 0.92)    | 0.70 (0.38 - 0.87)   | 0.88 (0.72 - 0.95)  | 0.72 (0.42 - 0.88) | 0.78 (0.53 - 0.90)    | 0.54 (0.30 - 0.75)            | 0.66 (0.45 - 0.82)            |
|                     | Men     | 0.62 (0.27 - 0.83)    | -0.06 (-0.34 - 0.31) | 0.20 (-0.17 - 0.56) | 0.51 (0.11 - 0.77) | 0.32 (-0.03 - 0.62)   | 0.12 (-0.02 - 0.35)           | 0.31 (0.11 - 0.57)            |
| <b>Volume</b>       | Overall | 0.79 (0.64 - 0.88)    | 0.69 (0.48 - 0.82)   | 0.84 (0.73 - 0.91)  | 0.77 (0.61 - 0.87) | 0.77 (0.61 - 0.87)    | 0.59 (0.39 - 0.75)            | 0.72 (0.58 - 0.83)            |
|                     | Women   | 0.90 (0.78 - 0.96)    | 0.82 (0.59 - 0.92)   | 0.92 (0.79 - 0.97)  | 0.74 (0.45 - 0.89) | 0.84 (0.65 - 0.94)    | 0.68 (0.43 - 0.85)            | 0.77 (0.59 - 0.89)            |
|                     | Men     | 0.60 (0.24 - 0.82)    | -0.05 (-0.34 - 0.33) | 0.20 (-0.16 - 0.55) | 0.72 (0.43 - 0.88) | 0.37 (0.04 - 0.64)    | 0.27 (0.07 - 0.52)            | 0.40 (0.18 - 0.64)            |

Note. - ADC = Apparent Diffusion Coefficient, Std = Standard deviation.
